# Supplementary material for: Molecular fossils reveal ancient associations of dsDNA viruses with several phyla of fungi
Source: PubMed Central journal article supplement — Virus Evol. 2020 Feb 13;6(1):veaa008. doi: 10.1093/ve/veaa008 (PMC7017919; doi:10.1093/ve/veaa008), 2020-02-13
Supplement: veaa008_supplementary_data.pdf [file veaa008_supplementary_data.pdf]

## Supplementary Information

**Supplementary Table 1. Information on fundsalphaviruses and fundsbetaviruses**

| Virus           | Fungus phylum         | Fungus species<br>(abbreviation)                | Accession No.   | Virus copy<br>No. | DNAP Position                |
|-----------------|-----------------------|-------------------------------------------------|-----------------|-------------------|------------------------------|
| Fundsalphavirus | Neocallimastigomycota | <i>Neocallimastix<br/>californiae</i> (Neo_cal) | GCA_002104975.1 | 1                 | MCOG01000005.1_727220-727735 |
|                 |                       |                                                 |                 | 2                 | MCOG01000112.1_393-1206      |
|                 |                       |                                                 |                 | 3                 | MCOG01000149.1_384862-384638 |
|                 |                       |                                                 |                 | 4                 | MCOG01000331.1_171535-170315 |
|                 |                       |                                                 |                 | 5                 | MCOG01000452.1_67957-69018   |
|                 |                       |                                                 |                 | 6                 | MCOG01000524.1_43418-42306   |
|                 |                       |                                                 |                 | 7                 | MCOG01000549.1_40523-41719   |
|                 |                       |                                                 |                 | 8                 | MCOG01000566.1_40848-39946   |
|                 |                       |                                                 |                 | 9                 | MCOG01000572.1_150-1328      |
|                 |                       |                                                 |                 | 10                | MCOG01000618.1_15743-16924   |
|                 |                       |                                                 |                 | 11                | MCOG01000648.1_20085-19729   |
|                 |                       |                                                 |                 | 12                | MCOG01000665.1_4185-5024     |
|                 |                       |                                                 |                 | 13                | MCOG01000753.1_4977-6113     |
|                 |                       |                                                 |                 | 14                | MCOG01000764.1_5534-6112     |
|                 |                       |                                                 |                 | 15                | MCOG01000869.1_1652-471      |
|                 |                       |                                                 |                 | 16                | MCOG01000891.1_3820-4932     |
|                 |                       |                                                 |                 | 17                | MCOG01000937.1_5753-6934     |
|                 |                       |                                                 |                 | 18                | MCOG01001255.1_12283-11163   |
|                 |                       |                                                 |                 | 19                | MCOG01001348.1_5060-6172     |
|                 |                       |                                                 |                 | 20                | MCOG01001403.1_10005-9517    |

|                   |                             |                      |    |                              |
|-------------------|-----------------------------|----------------------|----|------------------------------|
|                   |                             |                      | 21 | MCOG01001412.1_10066-9453    |
|                   |                             |                      | 22 | MCOG01001593.1_1675-599      |
|                   |                             |                      | 23 | MCOG01001603.1_6842-6093     |
|                   |                             |                      | 24 | MCOG01001608.1_6791-6055     |
|                   |                             |                      | 25 | MCOG01001719.1_4122-4502     |
|                   |                             |                      | 26 | MCOG01001761.1_2825-1662     |
|                   | <i>Piromyces finnis</i>     | GCA_002104945.1      | 1  | MCFH01000019.1_631779-631555 |
|                   | (Pir_fin)                   |                      | 2  | MCFH01000063.1_79043-77322   |
|                   |                             |                      | 3  | MCFH01000069.1_221525-220380 |
|                   |                             |                      | 4  | MCFH01000083.1_112059-110575 |
|                   |                             |                      | 5  | MCFH01000089.1_115070-116563 |
|                   |                             |                      | 6  | MCFH01000089.1_61193-62587   |
|                   | <i>Anaeromyces robustus</i> | GCA_002104895.1      | 1  | MCFG01000208.1_45763-44228   |
|                   | (Ana_rob)                   |                      | 2  | MCFG01000243.1_83698-81851   |
|                   |                             |                      | 3  | MCFG01000387.1_13696-12551   |
|                   |                             |                      | 4  | MCFG01000494.1_10398-8269    |
|                   | <i>Piromyces</i> sp. E2     | (Pir_GCA_002157105.1 | 1  | KZ150781.1_166785-168551     |
|                   | E2)                         |                      | 2  | KZ151082.1_44419-43901       |
|                   |                             |                      | 3  | KZ151426.1_6775-7554         |
|                   |                             |                      | 4  | KZ151806.1_3433-4230         |
|                   | <i>Pecoromyces</i>          | GCA_000412615.1      | 1  | ASRE01014393.1_1211-3166     |
|                   | <i>ruminatum</i> (Pec_rum)  |                      |    |                              |
| Basidiobolomycota | <i>Basidiobolus</i>         | GCA_002104905.1      | 1  | MCFE01000191.1_77124-76513   |
|                   | <i>meristosporus</i>        |                      |    |                              |
|                   | (Bas_mer)                   |                      |    |                              |

|                     |               |                                               |                 |                            |                              |
|---------------------|---------------|-----------------------------------------------|-----------------|----------------------------|------------------------------|
|                     |               |                                               | 2               | MCFE01000333.1_22315-21848 |                              |
|                     |               |                                               | 3               | MCFE01000822.1_1945_4329   |                              |
|                     |               | <i>Basidiobolus heterosporus</i><br>(Bas_het) | GCA_000697455.1 | 1                          | JNET01021252.1_685-104       |
|                     |               |                                               | 2               | JNET01029572.1_8763-8128   |                              |
| Mucoromycota        |               | <i>Cunninghamella elegans</i> (Cun_ele)       | GCA_000697015.1 | 1                          | JNDR01000766.1_801-3227      |
|                     |               |                                               | 2               | JNDR01000766.1_3307-4212   |                              |
|                     |               |                                               | 3               | JNDR01000766.1_2-700       |                              |
|                     |               | <i>Bifiguratus adelaidae</i><br>(Bif_ade)     | GCA_002261195.1 | 1                          | MVBO01000368.1_2183-339      |
|                     |               | <i>Saksenaea oblongispora</i><br>(Sak_obl)    | GCA_000697495.1 | 1                          | JNEV01001195.1_180347-182671 |
| Entomophthoromycota |               | <i>Conidiobolus coronatus</i> (Con_cor)       | GCA_001566745.1 | 1                          | KQ964598.1_37719-39284       |
|                     |               |                                               | 2               | KQ964610.1_47151-47588     |                              |
| Mortierellomycota   |               | <i>Mortierella elongata</i><br>(Mor_elo)      | GCA_001651415.1 | 1                          | KV442190.1_1-882             |
|                     |               |                                               | 2               | KV442340.1_1451-111        |                              |
|                     |               | <i>Mortierella verticillata</i> (Mor_ver)     | GCA_000739165.1 | 1                          | KN042439.1_59015-58065       |
| Kickxellomycota     |               | <i>Zancudomyces culisetae</i> (Zan_cul)       | GCA_001969505.1 | 1                          | LSSK01000604.1_8801-6927     |
| Fundsbetavirus      | Glomeromycota | <i>Rhizophagus irregularis</i> (Rhi_irr)      | GCA_001593125.1 | 1                          | LLXH01000157.1_5406-5146     |
|                     |               |                                               | 2               | LLXH01000293.1_51891-53817 |                              |
|                     |               |                                               | 3               | LLXH01000317.1_32257-32018 |                              |
|                     |               |                                               | 4               | LLXH01001253.1_5614-8037   |                              |
|                     |               |                                               | 5               | LLXH01001691.1_15537-19028 |                              |
|                     |               |                                               | 6               | LLXH01002175.1_3189-293    |                              |

|    |                            |
|----|----------------------------|
| 7  | LLXH01002843.1_66-3107     |
| 8  | LLXH01002845.1_579-2819    |
| 9  | LLXH01003046.1_163-2130    |
| 10 | LLXH01003321.1_3240-667    |
| 11 | LLXH01003480.1_16271-13271 |
| 12 | LLXH01003482.1_4466-1887   |
| 13 | LLXH01003505.1_2973-1064   |
| 14 | LLXH01003557.1_4153-2340   |
| 15 | LLXH01003943.1_3823-5355   |
| 16 | LLXH01004079.1_1870-2274   |
| 17 | LLXH01005543.1_48-1136     |
| 18 | LLXH01005626.1_3469-2768   |
| 19 | LLXH01005626.1_4839-5588   |
| 20 | LLXH01006512.1_2-652       |
| 21 | LLXH01006676.1_3030-3833   |
| 22 | LLXH01006957.1_2-955       |
| 23 | LLXH01007161.1_6-896       |
| 24 | LLXH01007210.1_860-84      |
| 25 | LLXH01007333.1_14-493      |
| 26 | LLXH01008151.1_766-35      |
| 27 | LLXH01010162.1_570-1       |
| 28 | LLXH01010738.1_105-524     |
| 29 | LLXH01010756.1_120-524     |
| 30 | LLXH01010763.1_3-506       |

---

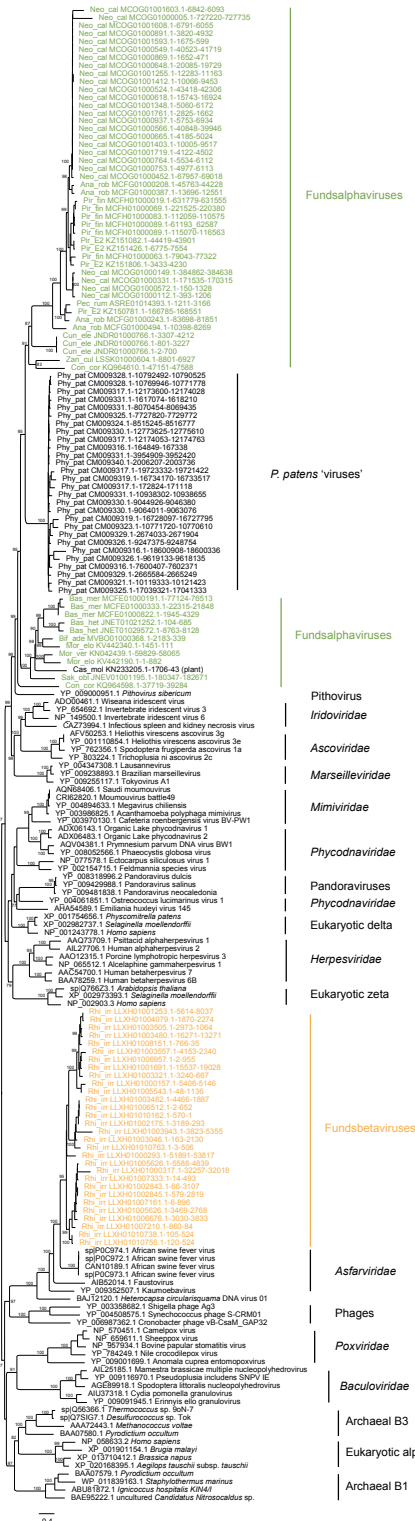

**Supplementary Figure 1. ML tree for DNAP.** Fundsalphaviruses and Fundsbetaviruses were labeled in green and orange, respectively.

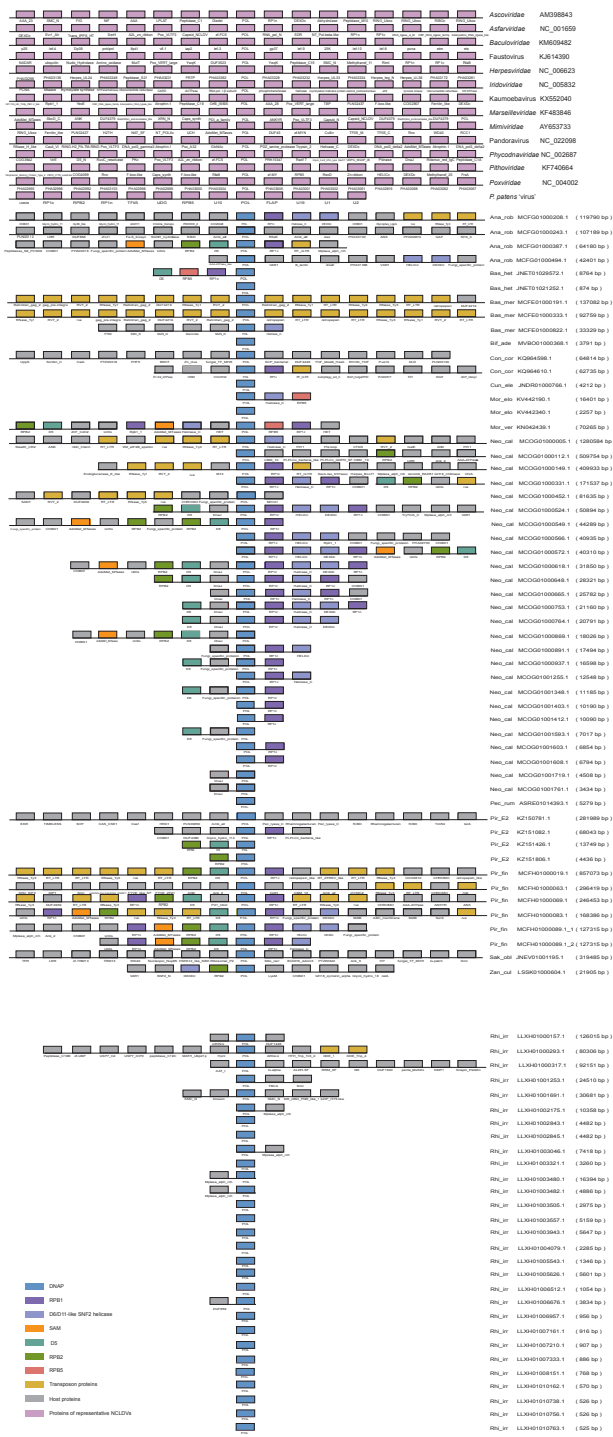

Fundsalphaviruses

Fundsbetaviruses

Supplementary Figure 2. Gene contents of Fundsalphaviruses, Fundsbetaviruses, other dsDNA virus families, and *P. patens* 'virus'. Different conserved proteins and proteins involved in transposition were labeled by different colors.

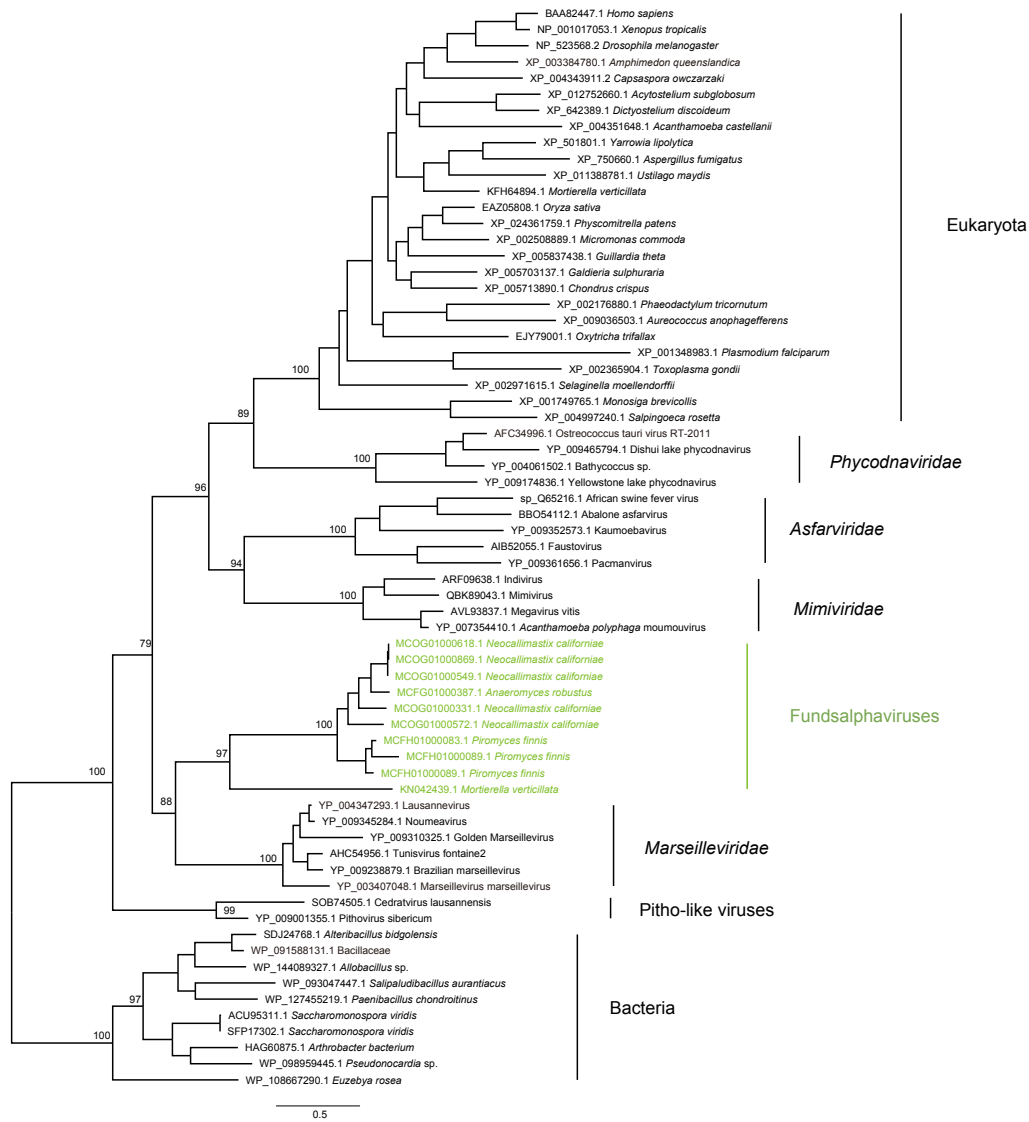

Supplementary Figure 3. ML tree for SAM. Fundsalphaviruses were labeled in green.





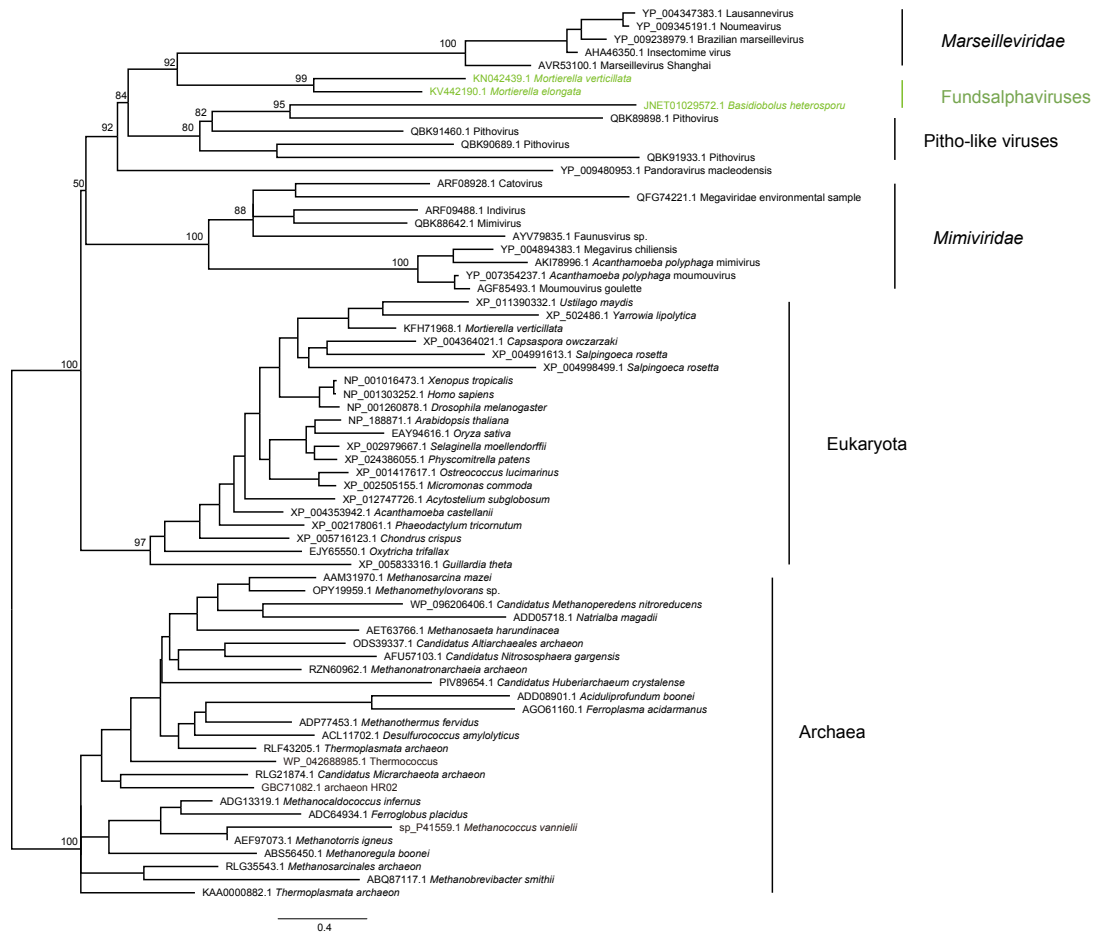

**Supplementary Figure 5. ML tree for RPB5. Fundsalphaviruses were labeled in green.**

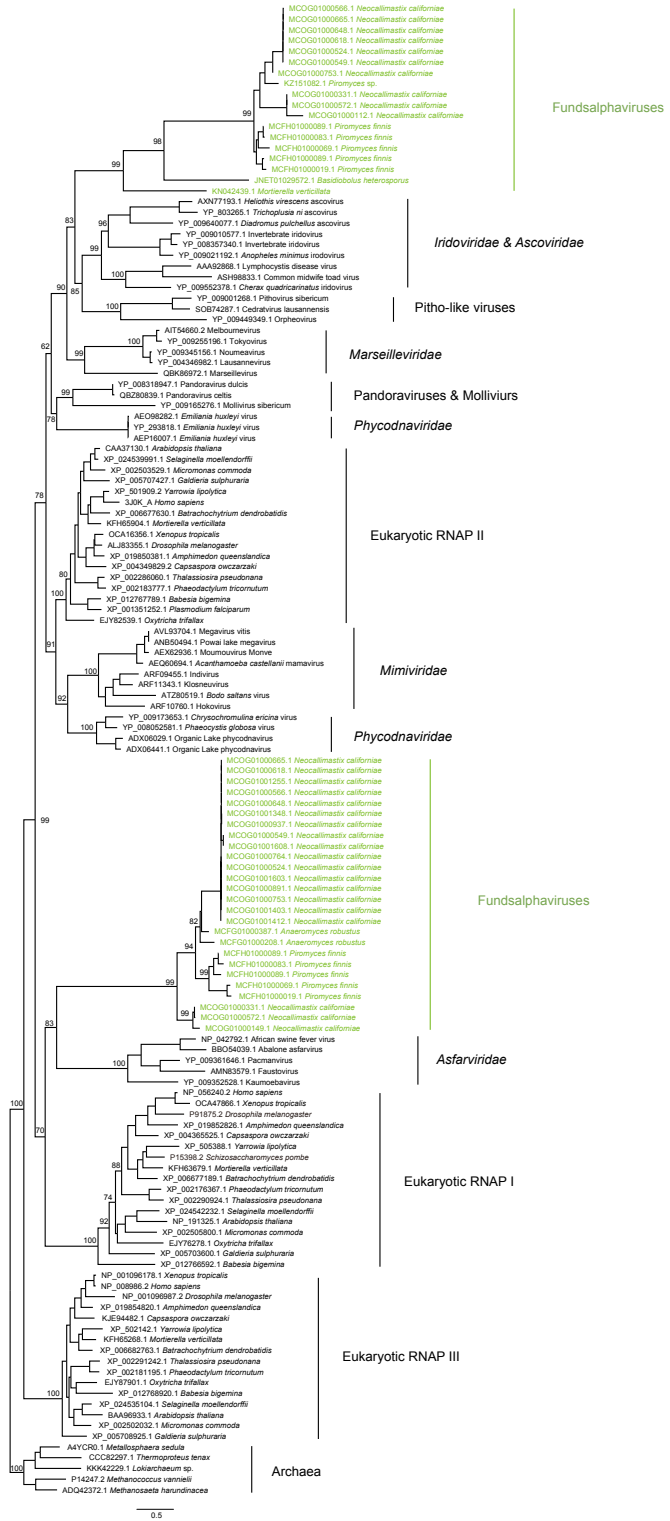

Supplementary Figure 6. ML tree for RPB1. Fundsalphaviruses were labeled in green.

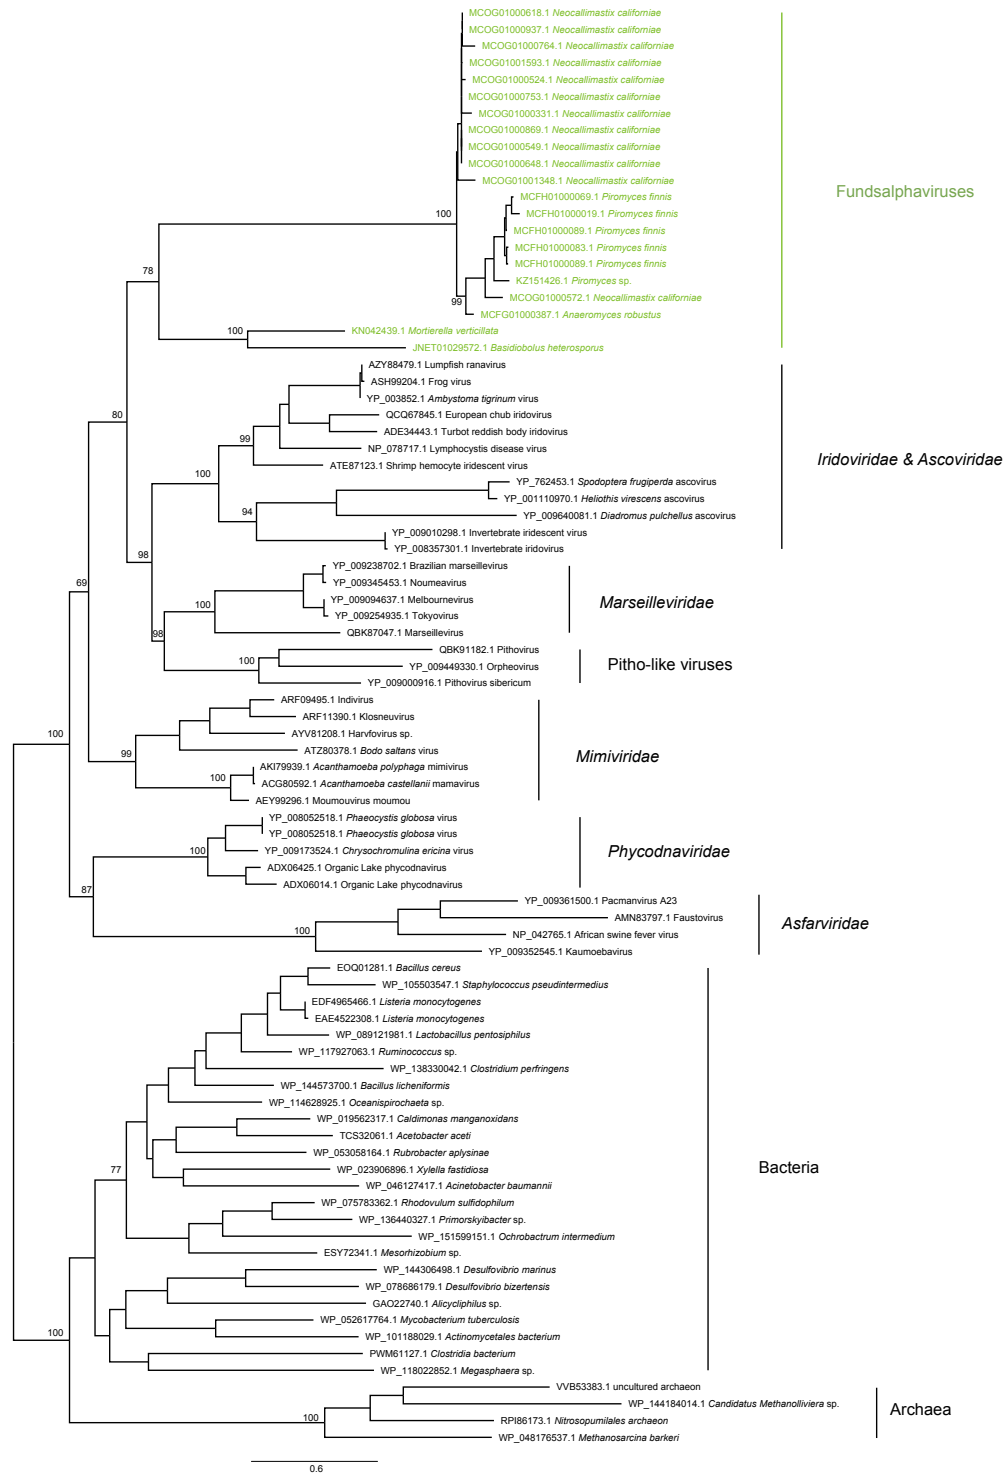

**Supplementary Figure 7. ML tree for D5 helicase-primase. Fundsalphaviruses were labeled in green.**

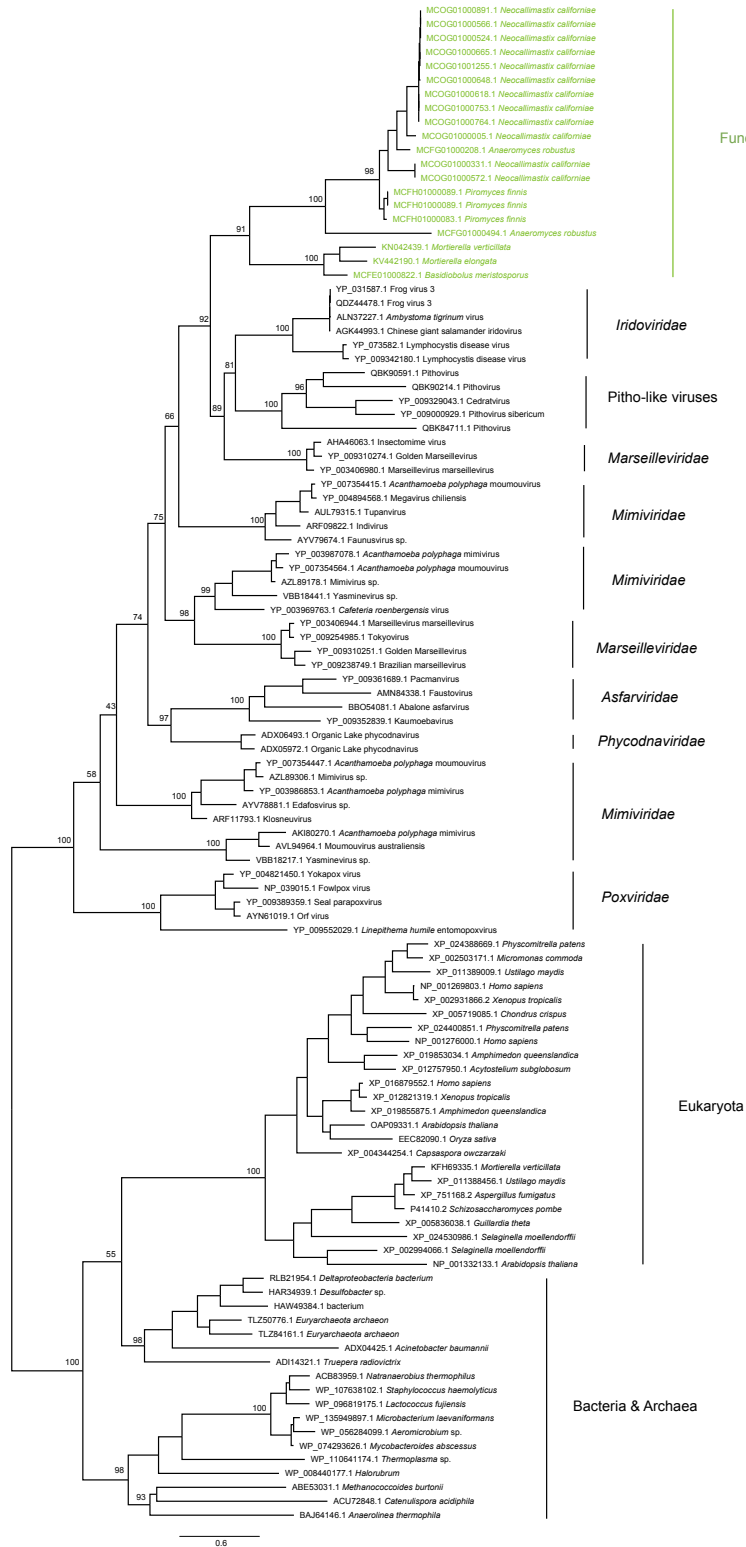

**Supplementary Figure 8. ML tree for D6/D11-like SNF2 helicase.** Fundsalphaviruses were labeled in green.



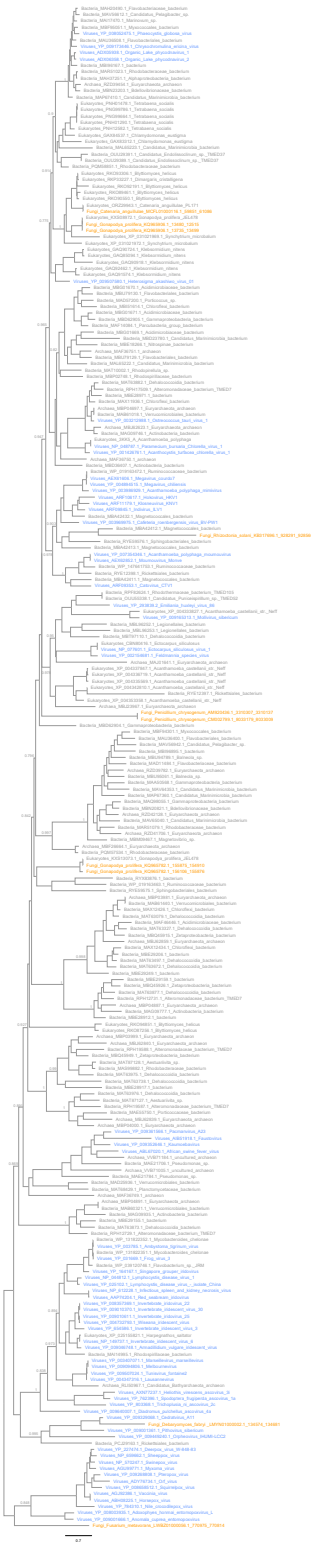

**Supplementary Figure 10. ML tree for MCP.** Viruses and significant hits from fungi were labeled by blue and orange, respectively.
